# Supplementary material for: Cost-Effectiveness of Risk-Reducing Surgery for Breast and Ovarian Cancer Prevention: A Systematic Review
Source: Cancers (Basel). 2022 Dec 12;14(24):6117. doi: 10.3390/cancers14246117 (PMC9776851; doi:10.3390/cancers14246117)
Supplement: Supplementary file 1 [file cancers-14-06117-s001.zip › Copy of Supplementary File S3-v1.xlsx]

## Sheet: CHEERS checklist score
	Study	Overall score	TITLE	ABSTRACT	INTRODUCTION	METHODS																		RESULTS				DISCUSSION	OTHER RELEVANT INFORMATION
			Title	Abstract	Background and objectives	Health economic analysis plan	Study population	Setting and location	Comparators	Perspective	Time horizon	Discount rate	Selection of outcomes	Measurement of outcomes	Valuation of outcomes	Measurement and valuation of resources and costs	Currency, price date, and conversion	Rationale and description of model	Analytics and assumptions	Characterizing heterogeneity	Characterizing distributional effects	Characterizing uncertainty	Approach to engagement with patients and others affected by the study	Study parameters	Summary of main results	Effect of uncertainty	Effect of engagement with patients and others affected by the study	Study findings, limitations, generalizability, and current knowledge	Source of funding	Conflicts of interest
	Anderson,2006	21	1	1	0.5	0	1	1	1	0.5	0.5	0.5	1	1	1	1	1	0.5	1	1	0	1	0	0.5	1	1	0	1	1	1
	Bommer,2021	22	1	1	1	0	1	1	1	0.5	1	0.5	1	1	1	1	0.5	0.5	1	1	0	1	0	1	1	1	0	1	1	1
	Cadish,2017	17	1	1	1	0	1	0	1	0	0	0	0.5	1	1	1	1	1	1	0	0	0.5	0	0.5	1	0.5	0	1	1	1
	Dilley,2017	20	1	1	1	0	1	0	1	1	0	0.5	1	1	1	1	1	0.5	1	0	0	1	0	1	1	1	0	1	1	1
	Gamble,2017	21	1	1	1	0	1	0.5	1	0.5	1	1	1	1	1	1	1	1	1	1	0	1	0	1	1	1	0	1	0	0
	Grann,1998	16	1	0.5	1	0	1	0	1	0	1	0.5	1	1	1	1	1	0.5	0.5	0	0	0.5	0	1	1	0.5	0	1	0	0
	Grann,2011	19	1	1	1	0	1	0	1	0.5	0.5	0.5	1	1	1	1	1	0.5	0.5	1	0	0.5	0	1	1	1	0	1	1	0
	Kwon,2015	19.5	1	1	1	0	1	0	1	1	1	1	1	1	1	1	1	0.5	0.5	0	0	0.5	0	1	1	1	0	1	0	1
	Kwon,2008	18	1	1	1	0	1	0	1	1	1	1	1	1	1	1	1	0.5	0.5	0	0	0	0	1	1	1	0	1	0	0
	Kwon,2013	18.5	0.5	0.5	1	0	1	0	1	1	0	1	1	1	1	1	0.5	0	0.5	1	0	0.5	0	1	1	1	0	1	1	1
	Manchanda,2016	22	1	1	1	0	1	1	1	1	1	1	1	1	1	1	1	0.5	0.5	0	0	1	0	1	1	1	0	1	1	1
	Manchanda,2015	21.5	0.5	1	1	0	1	1	1	0	1	1	1	1	1	1	1	1	1	0	0	1	0	1	1	1	0	1	1	1
	Muller,2016	20.5	1	1	1	0	1	1	1	1	1	1	1	1	1	1	0	0.5	1	0	0	1	0	1	1	1	0	1	1	0
	Naumann, 2021	15	0.5	0.5	1	0	1	1	1	1	1	0.5	0.5	0.5	0.5	0.5	0.5	0.5	0.5	0	0	0	0	0.5	1	0.5	0	1	0	1
	Norum,2008	17.5	1	0.5	0.5	0	1	1	1	0	1	0.5	1	1	1	1	1	0.5	0.5	0	0	0	0	0.5	1	0.5	0	1	1	1
	Petelin,2020	22.5	0.5	0.5	1	0	1	1	1	0.5	1	1	1	1	1	1	1	1	1	1	0	1	0	1	1	1	0	1	1	1
	Subramaniam,2019	20.5	1	1	0.5	0	1	1	1	0.5	1	0.5	1	1	1	1	1	0.5	0.5	0	0	1	0	1	1	1	0	1	1	1
	Tai,2018	20.5	0.5	1	1	0	1	1	1	0.5	1	0.5	1	1	1	1	1	0.5	0.5	0	1	1	0	1	1	1	0	1	0	1
	Venkatesh,2019	22	1	1	1	0	1	1	1	1	1	1	1	1	1	1	1	0.5	0.5	1	0	1	0	1	1	1	0	1	0	1
	Wright,2021	23	1	1	1	1	1	0.5	1	0.5	1	1	1	1	1	1	1	1	1	1	0	1	0	1	1	1	0	1	0	1
	Yamauchi,2018	21.5	1	1	1	0	1	1	1	0.5	1	0.5	1	1	1	1	0.5	0.5	0.5	1	0	1	0	1	1	1	0	1	1	1
	Yang,2011	19	1	1	1	0	1	0	1	0.5	0	0.5	1	1	1	1	1	0.5	0.5	0	0	1	0	1	1	1	0	1	1	1
