# Supplementary material for: Cost-Effectiveness of Risk-Reducing Surgery for Breast and Ovarian Cancer Prevention: A Systematic Review
Source: Cancers (Basel). 2022 Dec 12;14(24):6117. doi: 10.3390/cancers14246117 (PMC9776851; doi:10.3390/cancers14246117)
Supplement: Supplementary file 1 [file cancers-14-06117-s001.zip › Supplementary File S1-v1.pdf]

## Supplementary File S1. Search strategy.

### 1. Ovid MEDLINE

- 1 exp Prophylactic Surgical Procedures/
- 2 exp Mastectomy/
- 3 exp Ovariectomy/ or exp Salpingo-oophorectomy/
- 4 exp Salpingectomy/
- 5 ((prophylac\* or prophylaxis or prevent\* or risk-reduc\* or risk reduc\*) adj5 (surg\* or procedur\* or interven\* or mastectom\* or RRM or salping\* or oophorectomy\* or ovar\* or RRSO or RRESDO)).mp.
- 6 1 or 2 or 3 or 4 or 5
- 7 exp Breast Neoplasms/
- 8 exp Ovarian Neoplasms/
- 9 exp Fallopian Tube Neoplasms/
- 10 exp Peritoneal Neoplasms/
- 11 ((ovar\* or fallopian\* or peritone\* or breast or mammary) adj5 (cancer\* or neoplasm\* or tumor\* or tumour\* or malignan\* or carcinoma\* or adenocarcinoma\*)).
- 12 7 or 8 or 9 or 10 or 11
- 13 exp Cost-Benefit Analysis/
- 14 (cost\* or cost-effective\* or cost-utilit\* or cost-benefit\* or CEA or CUA or CBA).mp.
- 15 13 or 14
- 16 6 and 12 and 15
- 17 limit 16 to (english language and humans)

### 2. Embase Classic+Embase

- 1 exp prophylactic surgical procedure/
- 2 exp prophylactic mastectomy/ or exp mastectomy/
- 3 exp salpingooophorectomy/
- 4 exp ovariectomy/
- 5 exp salpingectomy/
- 6 ((prophylac\* or prophylaxis or prevent\* or risk-reduc\* or risk reduc\*) adj5 (surg\* or procedur\* or interven\* or mastectom\* or RRM or salping\* or oophorectomy\* or ovar\* or RRSO or RRESDO)).mp.
- 7 1 or 2 or 3 or 4 or 5 or 6
- 8 exp breast tumor/
- 9 exp ovary tumor/

- 10 exp uterine tube tumor/
- 11 exp peritoneum tumor/
- 12 ((ovar\* or fallopian\* or peritone\* or breast or mammary) adj5 (cancer\* or neoplasm\* or tumor\* or tumour\* or malignan\* or carcinoma\* or adenocarcinoma\*)).mp.
- 13 8 or 9 or 10 or 11 or 12
- 14 exp "cost effectiveness analysis"/
- 15 exp "cost utility analysis"/
- 16 exp "cost benefit analysis"/
- 17 (cost\* or cost-effective\* or cost-utilit\* or cost-benefit\* or CEA or CUA or CBA).mp.
- 18 14 or 15 or 16 or 17
- 19 7 and 13 and 18
- 20 limit 19 to (human and english language)

### 3. Cochrane Library

- ID Search
- #1 MeSH descriptor: [Mastectomy] explode all trees
- #2 MeSH descriptor: [Salpingo-oophorectomy] explode all trees
- #3 MeSH descriptor: [Ovariectomy] explode all trees
- #4 MeSH descriptor: [Salpingectomy] explode all trees
- #5 MeSH descriptor: [Prophylactic Surgical Procedures] explode all trees
- #6 ((prophylac\* or prophylaxis or prevent\* or risk-reduc\* or risk reduc\*) near/5 (surg\* or procedur\* or interven\* or mastectom\* or RRM or salping\* or oophorectomy\* or ovar\* or RRSO or RRESDO)):ti,ab,kw
- #7 #1 or #2 or #3 or #4 or #5 or #6
- #8 MeSH descriptor: [Breast Neoplasms] explode all trees
- #9 MeSH descriptor: [Fallopian Tube Neoplasms] explode all trees
- #10 MeSH descriptor: [Ovarian Neoplasms] explode all trees
- #11 MeSH descriptor: [Peritoneal Neoplasms] explode all trees
- #12 ((ovar\* or fallopian\* or peritone\* or breast or mammary) near/5 (cancer\* or neoplasm\* or tumor\* or tumour\* or malignan\* or carcinoma\* or adenocarcinoma\*)):ti,ab,kw
- #13 #8 or #9 or #10 or #11 or #12
- #14 MeSH descriptor: [Cost-Benefit Analysis] explode all trees
- #15 (cost\* or cost-effective\* or cost-utilit\* or cost-benefit\* or CEA or CUA or CBA):ti,ab,kw

#16 #14 or #15

#17 #7 and #13 and #16

#### 4. PubMed

- 1 prophylactic surgical procedure[MeSH Terms]
- 2 mastectomy[MeSH Terms]
- 3 salpingo-oophorectomy[MeSH Terms]
- 4 ovariectomy[MeSH Terms]
- 5 salpingectomy[MeSH Terms]
- 6 ((prophylac\* or prophylaxis or prevent\* or risk-reduc\* or risk reduc\*) near (surg\* or procedur\* or interven\* or mastectom\* or RRM or salping\* or oophorectomy\* or ovar\* or RRSO or RRESDO))
- 7 breast neoplasm[MeSH Terms]
- 8 ovary neoplasm[MeSH Terms]
- 9 fallopian tube neoplasm[MeSH Terms]
- 10 peritoneal neoplasm[MeSH Terms]
- 11 (ovar\* or fallopian\* or peritone\* or breast or mammary) near (cancer\* or neoplasm\* or tumor\* or tumour\* or malignan\* or carcinoma\* or adenocarcinoma\*)
- 12 #1 or #2 or #3 or #4 or #5 or #6
- 13 #7 or #8 or #9 or #10 or #11
- 14 cost effectiveness[MeSH Terms]
- 15 cost benefit[MeSH Terms]
- 16 cost\* or cost-effective\* or cost-utilit\* or cost-benefit\* or CEA or CUA or CBA
- 17 #14 or #15 or #16
- 18 #12 and #13 and #17
