# Supplementary material for: Cost-Effectiveness of Risk-Reducing Surgery for Breast and Ovarian Cancer Prevention: A Systematic Review
Source: Cancers (Basel). 2022 Dec 12;14(24):6117. doi: 10.3390/cancers14246117 (PMC9776851; doi:10.3390/cancers14246117)
Supplement: Supplementary file 1 [file cancers-14-06117-s001.zip › Supplementary File S2-v1.pdf]

Table S1. Study characteristics and main findings.

| Study                        | Country     | Population                                                    | Risk profile | Lifetime cancer-risk                                                                                        | Age entering model | Intervention                                                        | Comparator                                                                     | ICER/ICUR                                                                                                                                                                                                                                                                                                                                                           | Study reported conclusion                                                                                                                                                                                                                               |
|------------------------------|-------------|---------------------------------------------------------------|--------------|-------------------------------------------------------------------------------------------------------------|--------------------|---------------------------------------------------------------------|--------------------------------------------------------------------------------|---------------------------------------------------------------------------------------------------------------------------------------------------------------------------------------------------------------------------------------------------------------------------------------------------------------------------------------------------------------------|---------------------------------------------------------------------------------------------------------------------------------------------------------------------------------------------------------------------------------------------------------|
| Women with <i>BRCA1/2</i> PV |             |                                                               |              |                                                                                                             |                    |                                                                     |                                                                                |                                                                                                                                                                                                                                                                                                                                                                     |                                                                                                                                                                                                                                                         |
| Anderson, 2006 [1]           | USA         | Unaffected <i>BRCA1/2</i> PV-carriers                         | High-risk    | <i>BRCA1</i> : BC-62%, OC-52%<br><i>BRCA2</i> : BC-76%, OC-23%                                              | 35                 | RRM at 35yo<br>RRSO at 35yo<br>RRM+RRSO at 35yo                     | Surveillance<br>Chemoprevention                                                | <i>BRCA1</i> :<br>RRSO at 35yo was the most cost-saving<br><i>BRCA2</i> :<br>RRM+RRSO at 35yo vs. RRSO at 35yo: \$3,125/QALY                                                                                                                                                                                                                                        | The most cost-effective strategies for <i>BRCA1</i> and <i>BRCA2</i> PV-carriers were RRSO and combined RRSO and RRM, respectively.                                                                                                                     |
| Bommer, 2021 [2]             | Switzerland | Unaffected <i>BRCA1/2</i> PV-carriers                         | High-risk    | <i>BRCA1</i> : BC-72%, OC-44%<br><i>BRCA2</i> : BC-69%, OC-17%                                              | 40                 | RRM at 40yo<br>RRSO at 40yo<br>RRM+RRSO at 40yo                     | Surveillance<br>Chemoprevention                                                | RRM+RRSO at 40yo was the most cost-saving                                                                                                                                                                                                                                                                                                                           | Combined RRM and RRSO was the most cost-saving strategy for both <i>BRCA1</i> and <i>BRCA2</i> PV-carriers.                                                                                                                                             |
| Grann, 1998 [3]              | USA         | Unaffected <i>BRCA1/2</i> PV-carriers from high-risk families | High-risk    | High-risk model: BC-85%, OC-63%<br>Intermediate-risk model: BC-56%; OC-16%<br>Low-risk model: BC-40%, OC-6% | 30                 | RRM at 30yo<br>RRSO at 30yo<br>RRM+RRSO at 30yo                     | Surveillance                                                                   | LYG:<br>85% BC-risk/63% OC-risk: RRM at 30yo (\$2,159/LYG), RRSO/RRM+RRSO at 30yo (cost-saving)<br>56% BC-risk/16% OC-risk: RRM at 30yo (\$571/LYG), RRSO/RRM+RRSO at 30yo (cost-saving)<br>40%BC-risk/6% OC-risk: RRM at 30yo (\$1,632/LYG), RRSO/RRM+RRSO at 30yo (cost-saving)<br>QALY:<br>only RRM+RRSO for high-risk model was cost-saving (data not reported) | RRM, RRSO, and combined RRM and RRSO was cost-effective using LYG compared with surveillance.<br>RRSO and combined RRM and RRSO was not cost-effective using QALY compared with surveillance, except for the combined procedure in the high-risk model. |
| Grann, 2011 [4]              | USA         | Unaffected <i>BRCA1/2</i> PV-carriers                         | High-risk    | Reported on annual BC/OC risk                                                                               | 30                 | RRM at 35yo<br>RRSO at 35yo<br>RRM+RRSO at 35yo<br>RRSO+MRI at 35yo | Surveillance (mammography + MRI or mammography)<br>Chemoprevention (tamoxifen) | <i>BRCA1</i> :<br>RRSO at 35yo vs. RRM+RRSO at 35yo: \$2,101/QALY<br><i>BRCA2</i> :<br>RRSO at 35yo vs. RRM+RRSO at 35yo: \$5,535/QALY                                                                                                                                                                                                                              | RRSO was the most cost-effective strategy for both <i>BRCA1</i> and <i>BRCA2</i> PV-carriers.                                                                                                                                                           |
| Kwon, 2013 [5]               | Canada      | Unaffected <i>BRCA1/2</i> PV-carriers                         | High-risk    | <i>BRCA1</i> : BC-57%, OC-40%<br><i>BRCA2</i> : BC-49%, OC-18%                                              | 30                 | RRES at 40yo<br>RRES at 40yo with DO at 50yo                        | RRSO at 40yo                                                                   | <i>BRCA1</i> :<br>RRES at 40yo with DO at 50yo vs. RRSO at 40yo: \$20,153/QALY<br>RRES at 40 yo vs. RRSO at 40yo: \$18,118/QALY<br><i>BRCA2</i> :<br>RRES at 40yo with DO at 50yo vs. RRSO at 40yo: \$27,498/QALY<br>RRES at 40 yo vs. RRSO at 40yo: \$23,185/QALY                                                                                                  | RRESDO was a potentially cost-effective strategy and may be an acceptable alternative for those unwilling to undergo RRSO.                                                                                                                              |

|                      |           |                                             |           |                               |    |                                                                                                                            |                                  |                                                                                                                                                                                                                                                                                                 |                                                                                                                                                                                                                                                        |
|----------------------|-----------|---------------------------------------------|-----------|-------------------------------|----|----------------------------------------------------------------------------------------------------------------------------|----------------------------------|-------------------------------------------------------------------------------------------------------------------------------------------------------------------------------------------------------------------------------------------------------------------------------------------------|--------------------------------------------------------------------------------------------------------------------------------------------------------------------------------------------------------------------------------------------------------|
| Muller, 2018 [6]     | Germany   | Unaffected <i>BRCA1/2</i> PV-carriers       | High-risk | Reported on annual BC/OC risk | 30 | RRM at 30yo<br>RRSO at 30yo<br>RRM+RRSO at 30yo<br>RRM at 30yo + RRSO at 40yo                                              | Surveillance                     | RRM +RRSO at 30yo was the most cost-saving                                                                                                                                                                                                                                                      | Combined RRM and RRSO was the most cost-effective strategy for <i>BRCA1/2</i> PV-carriers.                                                                                                                                                             |
| Norum, 2008 [7]      | Norway    | Unaffected <i>BRCA1</i> PV-carriers         | High-risk | BC-58%,<br>OC-58%             | 30 | RRM at 30yo + RRSO at 35yo<br>RRSO at 35yo                                                                                 | Conservative (no action)         | RRM at 30yo + RRSO at 35yo vs. no action: \$835/LYG<br>RRSO at 35yo vs. no action: \$2,162/LYG                                                                                                                                                                                                  | RRSO with or without RRM in <i>BRCA1</i> PV-carriers was cost-effective.                                                                                                                                                                               |
| Petelin, 2020 [8]    | Australia | Unaffected <i>BRCA1/2</i> PV-carriers       | High-risk | Reported on annual BC/OC risk | 20 | Combined surveillance & risk-reduction Program (multidisciplinary clinic/RRSO/RRM/ breast screening)                       | Conservative (no action)         | <i>BRCA1</i> : \$23,353/QALY<br><i>BRCA2</i> : \$34,831/QALY                                                                                                                                                                                                                                    | Long-term management of <i>BRCA1/2</i> PV-carriers within a structured risk management & surveillance program was cost-effective.                                                                                                                      |
| Yamauchi, 2018 [9]   | Japan     | Unaffected <i>BRCA1/2</i> PV-carriers       | High-risk | Reported on annual BC/OC risk | 35 | RRM at 35yo<br>RRSO at 45yo<br>RRM at 35yo + RRSO at 45yo                                                                  | Surveillance                     | <i>BRCA1</i> :<br>RRM at 35yo +RRSO at 45yo was the most cost-saving<br><i>BRCA2</i> :<br>RRM at 35yo was the most cost-saving                                                                                                                                                                  | Combined RRM and RRSO was the most cost-effective strategy in <i>BRCA1</i> PV-carriers, and RRM was the most cost-effective strategy in <i>BRCA2</i> PV-carriers. RRM performed within 5-years following OC diagnosis at ≥50yo was not cost-effective. |
| Gamble, 2017 [10]    | USA       | Affected <i>BRCA1/2</i> PV-carriers with OC | High-risk | Not reported                  | 40 | RRM (5-years after OC diagnosis)                                                                                           | Surveillance (MRI + mammography) | <i>BRCA1</i> :<br>OC diagnosed at 40yo:<br>RRM vs. surveillance: \$79,431/LYG<br>OC diagnosed at 50yo:<br>RRM vs. surveillance: \$119,700/LYG<br><i>BRCA2</i> :<br>OC diagnosed at 40yo:<br>RRM vs. surveillance: \$113,090/LYG<br>OC diagnosed at 50yo:<br>RRM vs. surveillance: \$183,982/LYG | Surveillance should be advocated during the first several years after OC diagnosis, after which point the benefits of RRM can be considered based on patient age and <i>BRCA</i> status.                                                               |
| <b>Women with LS</b> |           |                                             |           |                               |    |                                                                                                                            |                                  |                                                                                                                                                                                                                                                                                                 |                                                                                                                                                                                                                                                        |
| Kwon, 2008 [11]      | USA       | Women with LS                               | High-risk | EC-50%,<br>OC-10%             | 30 | Hysterectomy + BSO at 30/40yo<br>Annual screening from 30yo until hysterectomy + BSO at 40yo<br>Annual screening from 30yo | Conservative (no action)         | Hysterectomy + BSO at 30yo vs. no action: \$17,807/QALY<br>Hysterectomy + BSO at 40yo vs. Hysterectomy + BSO at 30yo: \$6,448/QALY<br>Combined strategy vs. Hysterectomy + BSO at 40yo: \$249,774/QALY<br>Annual screening vs. Combined strategy: dominated                                     | Annual screening followed by hysterectomy and hysterectomy + BSO at 40yo was the most effective strategy, but the incremental benefit over prophylactic surgery alone was attained at substantial cost.                                                |
| Wright, 2021[12]     | USA       | Women with LS ( <i>MLH1/MSH</i> )           | High-risk | EC-48.9%<br>OC-17.4%          | 25 | Hysterectomy + BSO at 35/40/50yo                                                                                           | Conservative (no action)         | <i>MLH1/MSH6</i> :<br>Hysterectomy + ES at 40yo with DO at 50yo                                                                                                                                                                                                                                 | For <i>MSH2</i> PV-carriers, hysterectomy and                                                                                                                                                                                                          |

|                                             |        |                                                                                      |                                    |                                   |                                                                                   |                                                                                                       |                                                                                       |                                                                                                                                                                                                                                                  |                                                                                                                                                                                                                                                                                                                                                                                                                                                                                                                                                                                           |
|---------------------------------------------|--------|--------------------------------------------------------------------------------------|------------------------------------|-----------------------------------|-----------------------------------------------------------------------------------|-------------------------------------------------------------------------------------------------------|---------------------------------------------------------------------------------------|--------------------------------------------------------------------------------------------------------------------------------------------------------------------------------------------------------------------------------------------------|-------------------------------------------------------------------------------------------------------------------------------------------------------------------------------------------------------------------------------------------------------------------------------------------------------------------------------------------------------------------------------------------------------------------------------------------------------------------------------------------------------------------------------------------------------------------------------------------|
|                                             |        |                                                                                      | 2/MSH6/PM<br>S2 PV-<br>carriers)   |                                   |                                                                                   | with or<br>without<br>surveillance<br>from 35yo<br>Hysterectomy<br>+ ES at 40yo<br>with DO at<br>50yo |                                                                                       | vs. Hysterectomy + BSO<br>at 40yo:<br>\$33,269/20,008/QALY<br>MSH2:<br>Hysterectomy + BSO at<br>40yo vs. Hysterectomy +<br>BSO at 35yo:<br>\$5,180/QALY<br>PMS2:<br>Hysterectomy + BSO at<br>50yo vs. Hysterectomy +<br>BSO at 40yo: cost-saving | BSO at 40yo was the<br>most cost-effective<br>strategy; for <i>MLH1</i><br>and <i>MSH6</i> PV-<br>carriers,<br>hysterectomy and<br>ES at 40yo with DO<br>at 50yo was the<br>most cost-effective<br>strategy; for <i>PMS2</i><br>PV-carriers,<br>hysterectomy and<br>BSO at 50yo was the<br>most cost-effective<br>strategy.<br>Hysterectomy and<br>BSO was the most<br>cost-effective<br>strategy in women<br>with LS.                                                                                                                                                                    |
| Yang, 2011<br>[13]                          | USA    | Women with<br>LS                                                                     | High-<br>risk                      | EC: 40-60%<br>OC: 10%-<br>12%     | 30                                                                                | Surveillance<br>Hysterectomy (gynaecologic<br>+ BSO at 30yo screening/exa-<br>mination)               |                                                                                       | Hysterectomy + BSO at<br>30yo was cost-saving                                                                                                                                                                                                    |                                                                                                                                                                                                                                                                                                                                                                                                                                                                                                                                                                                           |
| <b>Women at low/intermediate OC-risk</b>    |        |                                                                                      |                                    |                                   |                                                                                   |                                                                                                       |                                                                                       |                                                                                                                                                                                                                                                  |                                                                                                                                                                                                                                                                                                                                                                                                                                                                                                                                                                                           |
| Manchand<br>a, 2016 [14]                    | UK     | Premenopau-<br>sal women                                                             | Low/<br>interme-<br>diate-<br>risk | OC-2%, 4%,<br>5%, 6%, 8%,<br>10%  | 40                                                                                | RRSO at 40yo                                                                                          | Conservative<br>(no action)                                                           | 4% OC-risk:<br>\$32,164/QALY<br>10% OC-risk:<br>\$8,283/QALY<br>5% OC-risk:<br>\$25,103/QALY<br>10% OC-risk:<br>\$3069/QALY                                                                                                                      | Premenopausal<br>RRSO was cost-<br>effective at ≥4%<br>lifetime OC-risk.<br>Postmenopausal<br>RRSO was cost-<br>effective at ≥5%<br>lifetime OC-risk.                                                                                                                                                                                                                                                                                                                                                                                                                                     |
| Manchand<br>a, 2015 [15]                    | UK     | Postmenopa-<br>usal women                                                            | Low/<br>interme-<br>diate-<br>risk | OC-2%, 4%,<br>5%, 6%, 8%,<br>10%  | 51                                                                                | RRSO at 51yo                                                                                          | Conservative<br>(no action)                                                           |                                                                                                                                                                                                                                                  |                                                                                                                                                                                                                                                                                                                                                                                                                                                                                                                                                                                           |
| <b>Women at baseline population OC-risk</b> |        |                                                                                      |                                    |                                   |                                                                                   |                                                                                                       |                                                                                       |                                                                                                                                                                                                                                                  |                                                                                                                                                                                                                                                                                                                                                                                                                                                                                                                                                                                           |
| Cadish,<br>2017 [16]                        | USA    | Women<br>having<br>vaginal<br>hysterectom-<br>y                                      | Baseline-<br>risk                  | OC-1.3%                           | Not reported                                                                      | Vaginal<br>hysterectomy<br>+ OBS                                                                      | Vaginal<br>hysterectomy                                                               | Vaginal hysterectomy +<br>OBS was cost-saving                                                                                                                                                                                                    | OBS was cost-<br>effective strategy<br>and should<br>routinely be<br>performed with<br>vaginal<br>hysterectomy.<br>OBS for women<br>undergoing<br>hysterectomy or<br>opting for<br>permanent<br>contraception may<br>be a cost-effective<br>strategy for<br>reducing OC-risk.<br>OBS was cost-<br>effective with both<br>procedures, but the<br>advantage greater at<br>time of<br>hysterectomy.<br>Hysterectomy with<br>OBS for benign<br>conditions would<br>reduce OC-risk at<br>acceptable cost and<br>was a cost-effective<br>alternative to tubal<br>ligation for<br>sterilization. |
| Dilley,<br>2017 [17]                        | USA    | Women<br>having<br>laparoscopic<br>hysterectom-<br>y or<br>sterilization             | Baseline-<br>risk                  | OC-1.3%                           | 45<br>(Laparoscopic<br>Hysterectomy<br>)<br>35<br>(Laparoscopic<br>sterilization) | Model 1:<br>Laparoscopic<br>hysterectomy<br>+ OBS<br>Model 2:<br>Laparoscopic<br>OBS                  | Model 1:<br>Laparoscopic<br>hysterectomy<br>Model 2:<br>Laparoscopic<br>sterilization | Laparoscopic<br>hysterectomy + OBS vs.<br>Hysterectomy: cost-<br>saving<br>Laparoscopic OBS vs.<br>Tubal occlusion:<br>\$33,883/QALY                                                                                                             |                                                                                                                                                                                                                                                                                                                                                                                                                                                                                                                                                                                           |
| Kwon,<br>2015 [18]                          | Canada | Premenopau-<br>sal women<br>having<br>hysterectom-<br>y or surgical<br>sterilization | Baseline-<br>risk                  | OC-1.4%                           | 45<br>(Hysterectom-<br>y)<br>35 (Surgical<br>sterilization)                       | Model 1:<br>Hysterectomy<br>+ OBS<br>Hysterectomy<br>+ BSO<br>Model 2:<br>OBS                         | Model 1:<br>Hysterectomy<br>Model 2:<br>Tubal ligation                                | Hysterectomy + OBS vs.<br>Hysterectomy: cost-<br>saving<br>OBS vs. Tubal ligation:<br>\$23,951/LYG                                                                                                                                               |                                                                                                                                                                                                                                                                                                                                                                                                                                                                                                                                                                                           |
| Naumann,<br>2021 [19]                       | USA    | Women<br>having<br>laparoscopic                                                      | Baseline-<br>risk                  | Reported on<br>annual OC-<br>risk | 20                                                                                | Model 1:                                                                                              | Model 1:<br>Laparoscopic<br>hysterectomy                                              | Laparoscopic<br>hysterectomy + OBS vs.                                                                                                                                                                                                           | Both strategies are<br>cost-effective when                                                                                                                                                                                                                                                                                                                                                                                                                                                                                                                                                |

|                               |        | hysterectomy<br>or tubal<br>ligation                                                         |                   |          |    | Laparoscopic<br>hysterectomy<br>+ OBS<br>Model 2:<br>OBS | Model 2:<br>Tubal ligation                                   | Hysterectomy:<br>\$1,667/QALY<br>OBS vs. Tubal ligation:<br>\$5,469/QALY | considering the cost<br>of OBS alone.                                                                                                                                                                                                                        |
|-------------------------------|--------|----------------------------------------------------------------------------------------------|-------------------|----------|----|----------------------------------------------------------|--------------------------------------------------------------|--------------------------------------------------------------------------|--------------------------------------------------------------------------------------------------------------------------------------------------------------------------------------------------------------------------------------------------------------|
| Subramani<br>am, 2019<br>[20] | USA    | Women<br>opting for<br>permanent<br>sterilization<br>at the time of<br>caesarean<br>delivery | Baseline-<br>risk | OC-1.26% | 33 | OBS                                                      | Tubal ligation                                               | OBS vs. Tubal ligation:<br>\$28,109/QALY                                 | In women<br>undergoing<br>caesarean delivery<br>with sterilization,<br>OBS was likely cost-<br>effective and may be<br>cost-saving in<br>comparison to tubal<br>ligation for OC-risk<br>reduction.                                                           |
| Tai, 2018<br>[21]             | Canada | Women<br>opting for<br>permanent<br>sterilization                                            | Baseline-<br>risk | OC-1.5%  | 40 | Laparoscopic<br>OBS                                      | Laparoscopic<br>tubal<br>coagulation/<br>tubal clips         | Laparoscopic OBS was<br>cost-saving                                      | Laparoscopic OBS<br>was the most cost-<br>effective strategy<br>when compared to<br>tubal clips/tubal<br>coagulation to<br>prevent OC.<br>OBS with caesarean<br>delivery were cost-<br>effective for<br>permanent<br>sterilization and<br>OC-risk reduction, |
| Venkatesh,<br>2019 [22]       | USA    | Women<br>opting for<br>permanent<br>sterilization<br>at the time of<br>caesarean<br>delivery | Baseline-<br>risk | OC-1.28% | 35 | OBS                                                      | Tubal ligation<br>Long-acting<br>reversible<br>contraception | OBS vs. Tubal ligation:<br>\$24,490/QALY                                 | but the<br>risks/benefits of<br>salpingectomy<br>with caesarean<br>delivery need to be<br>better defined<br>before a preferred<br>strategy can be<br>determined.                                                                                             |

BC, breast cancer; BSO, bilateral salpingo-oophorectomy; DO, delayed oophorectomy; EC, endometrial cancer; ES, early-salpingectomy; ICER, incremental cost-effectiveness ratio; ICUR, incremental cost-utility ratio; LS, Lynch syndrome; LYG, life-years gained; MRI, magnetic resonance imaging; OBS, opportunistic bilateral salpingectomy; OC, ovarian cancer; PV, pathogenic variant; QALY, quality-adjusted life-years; RRES, risk-reducing early salpingectomy; RRESDO, risk-reducing early salpingectomy with delayed oophorectomy; RRM, risk-reducing mastectomy; RRSO, risk-reducing salpingo-oophorectomy; yo, years old.

Table S2. Important assumptions and limitations of included studies.

| Studies                             | Additional study reported assumptions                                                                                                                                                                                                                                                                                                                                                                                                                                                                                                                                                                                                                                                                                                                                                                                                                                                                                                                                                                                                                                            | Study reported limitations*                                                                                                                                                                                                                                                                                                                                                                                                      | Additional points on Critical Review <sup>‡</sup>                                                                                                                                                                                                                                                                                                                                                                                                                                                 |
|-------------------------------------|----------------------------------------------------------------------------------------------------------------------------------------------------------------------------------------------------------------------------------------------------------------------------------------------------------------------------------------------------------------------------------------------------------------------------------------------------------------------------------------------------------------------------------------------------------------------------------------------------------------------------------------------------------------------------------------------------------------------------------------------------------------------------------------------------------------------------------------------------------------------------------------------------------------------------------------------------------------------------------------------------------------------------------------------------------------------------------|----------------------------------------------------------------------------------------------------------------------------------------------------------------------------------------------------------------------------------------------------------------------------------------------------------------------------------------------------------------------------------------------------------------------------------|---------------------------------------------------------------------------------------------------------------------------------------------------------------------------------------------------------------------------------------------------------------------------------------------------------------------------------------------------------------------------------------------------------------------------------------------------------------------------------------------------|
| <b>Women with <i>BRCA1/2</i> PV</b> |                                                                                                                                                                                                                                                                                                                                                                                                                                                                                                                                                                                                                                                                                                                                                                                                                                                                                                                                                                                                                                                                                  |                                                                                                                                                                                                                                                                                                                                                                                                                                  |                                                                                                                                                                                                                                                                                                                                                                                                                                                                                                   |
| Anderson, 2006 [1]                  | <ul style="list-style-type: none"> <li>Annual conditional cancer risks were converted from 10-year risks by assuming constant instantaneous rates of disease per-year within each decade.</li> <li>The proportion of patients who currently had metastatic BC or OC was assumed to be equal to the proportion of patients expected to die in the subsequent 3 years.</li> <li>The conditional probability of death in <i>BRCA1/2</i>-associated cancer was the same as that in cancer in general population.</li> <li>The BC risk-reduction of RRM was 90% without RRSO and 95% with RRSO; the BC risk-reduction of RRSO was 45%; the OC risk-reduction of RRSO was 96%.</li> <li>All premenopausal women would have HRT after RRSO, and it would not increase risk of BC, cardiovascular disease and osteoporosis.</li> <li>Costs of genetic testing and counselling were included.</li> <li>Utility of RRM was 0.76; RRSO was 0.82; both surgeries was 0.76 [23].</li> </ul>                                                                                                   | <ul style="list-style-type: none"> <li>The accuracy of model assumptions was uncertain.</li> <li>The risks of HRT for pre-menopausal women were unknown.</li> </ul>                                                                                                                                                                                                                                                              | <ul style="list-style-type: none"> <li>Separate analysis for <i>BRCA1/BRCA2</i> was performed.</li> <li>Reconstruction after RRM was not considered.</li> <li>Compliance with HRT was not considered.</li> <li>BC risk-reduction from RRSO was modelled at 45%.</li> <li>Impact of premenopausal RRSO on heart disease was not modelled.</li> <li>One-way sensitivity analysis was undertaken but PSA not done.</li> </ul>                                                                        |
| Bommer, 2022 [2]                    | <ul style="list-style-type: none"> <li>The distribution of the BC molecular subtypes HR+, TNBC and Her2+ were 20%, 70%, 10% for <i>BRCA1</i> and 80%, 10%, 10% for <i>BRCA2</i>.</li> <li>4.38% of women diagnosed with BC had a nodal involvement that required radiotherapy.</li> <li>6.63% of women had residual disease after OC surgery and 73% of women relapsed within 2-years.</li> <li>Uptake rate of RRS and HRT after RRSO was 100%.</li> <li>5% and 95% of women after RRM chose autologous and implant-based breast reconstruction, respectively.</li> <li>The BC risk-reduction of RRM was 91%; the OC risk-reduction of RRSO was 72%. RRSO did not reduce BC risk.</li> <li>A disease-related lower utility score than in disease-free state was assigned for the first 5-years after cancer diagnosis, after which they returned to an age-adjusted disease-free utility unless patients were ill again with cancer or died.</li> <li>Utility of RRM was 0.88; RRSO was 0.90; both surgeries was 0.79 [24]. The disutility was included for one-year.</li> </ul> | <ul style="list-style-type: none"> <li>Age-specific BC death rates of Switzerland were used regardless of the molecular subtype or <i>BRCA</i>-status as corresponding Swiss data was missing.</li> <li>Costs may be underestimated as costs of diagnostic biopsies, side effects and complications of chemoprevention, and costs of consultation were not included.</li> <li>Compliance with HRT was not considered.</li> </ul> | <ul style="list-style-type: none"> <li>Separate analysis for <i>BRCA1/BRCA2</i> was performed.</li> <li>Deterministic and probabilistic sensitivity analysis was undertaken.</li> <li>OC risk-reduction from RRSO was only 72%.</li> <li>Disutility for RRM and RRSO was included for only one-year.</li> <li>Impact of premenopausal RRSO on heart disease was not modelled.</li> <li>Annual gynaecological USS was included in surveillance (but this has no clinical benefit [25]).</li> </ul> |
| Grann, 1998 [3]                     | <ul style="list-style-type: none"> <li>20% of women diagnosed with BC was node-positive.</li> <li>Annual conditional probabilities of cancer were converted from 10-year risks by assuming constant instantaneous rates of disease per-year within each decade.</li> <li>The proportion of patients who currently had metastatic BC or OC was assumed to be equal to the proportion of patients expected to die in the subsequent 3 years.</li> <li>Cancer patients 10 years post-diagnosis had the same conditional probability of death as the general population.</li> <li>The BC risk-reduction of RRM was 90%; the OC risk-reduction of RRSO was 50% in the base-case.</li> <li>Women had reconstruction after RRM.</li> <li>All premenopausal women would have HRT after RRSO, and it would not increase risk of BC, cardiovascular disease and osteoporosis.</li> <li>Utility of RRSO was 0.91; both surgeries was 0.86 (from a time-trade-off survey by authors). Disutility of RRM was not included as they assumed most women chose RRSO or both surgeries.</li> </ul> | <ul style="list-style-type: none"> <li>The utility scores measured in community-based population survey, may be unduly low and did not take into account the reduction in anxiety that patients with FH derive from RRS.</li> </ul>                                                                                                                                                                                              | <ul style="list-style-type: none"> <li>No separate analysis was performed for <i>BRCA1/BRCA2</i>.</li> <li>Compliance with HRT was not considered.</li> <li>Impact of premenopausal RRSO on heart disease was not modelled</li> <li>OC risk-reduction of RRSO was only 50%.</li> <li><i>BRCA1</i> risks for BC and OC were too high at 85% and 63% respectively (though reflected data at the time).</li> <li>One way sensitivity analysis was performed but PSA not undertaken.</li> </ul>       |
| Grann, 2011 [4]                     | <ul style="list-style-type: none"> <li>Annual conditional probabilities of cancer were converted from 10-year risks by assuming constant instantaneous rates of disease per-year within each decade.</li> </ul>                                                                                                                                                                                                                                                                                                                                                                                                                                                                                                                                                                                                                                                                                                                                                                                                                                                                  | <ul style="list-style-type: none"> <li>There was lack of data regarding the assumptions used about</li> </ul>                                                                                                                                                                                                                                                                                                                    | <ul style="list-style-type: none"> <li>Separate analysis for <i>BRCA1/BRCA2</i> was performed.</li> </ul>                                                                                                                                                                                                                                                                                                                                                                                         |

|                  |                                                                                                                                                                                                                                                                                                                                                                                                                                                                                                                                                                                                                                                                                                                                                                                                                                                                                                                                                                                                                                                                                                         |                                                                                                                                                                                                                                                                                                                                                                             |                                                                                                                                                                                                                                                                                                                                                                                                                                                                                                                                                                                                                                                                                                                                                                                                                                                                                                                                                                                                             |
|------------------|---------------------------------------------------------------------------------------------------------------------------------------------------------------------------------------------------------------------------------------------------------------------------------------------------------------------------------------------------------------------------------------------------------------------------------------------------------------------------------------------------------------------------------------------------------------------------------------------------------------------------------------------------------------------------------------------------------------------------------------------------------------------------------------------------------------------------------------------------------------------------------------------------------------------------------------------------------------------------------------------------------------------------------------------------------------------------------------------------------|-----------------------------------------------------------------------------------------------------------------------------------------------------------------------------------------------------------------------------------------------------------------------------------------------------------------------------------------------------------------------------|-------------------------------------------------------------------------------------------------------------------------------------------------------------------------------------------------------------------------------------------------------------------------------------------------------------------------------------------------------------------------------------------------------------------------------------------------------------------------------------------------------------------------------------------------------------------------------------------------------------------------------------------------------------------------------------------------------------------------------------------------------------------------------------------------------------------------------------------------------------------------------------------------------------------------------------------------------------------------------------------------------------|
|                  | <ul style="list-style-type: none"> <li>• <i>BRCA1/2</i> PV-carriers with BC had the same conditional probability of developing OC as those who were well.</li> <li>• The conditional probability of death in <i>BRCA1/2</i>-associated cancer was the same as that in cancer in general population.</li> <li>• The stage distribution at BC diagnosis for women who received MRI was the same as that of the cases in a cohort who received annual MRI and mammography. The stage distribution among women who had mammography alone would be the same as the one for high-risk women in the control arm of a tamoxifen trial.</li> <li>• The BC risk-reduction of RRM was 90% without RRSO and 95% with RRSO; the BC risk-reduction of RRSO was 47%; the OC risk-reduction of RRSO was 96%.</li> <li>• HRT after RRSO does not increase the risk of BC, cardiovascular disease and osteoporosis.</li> <li>• Utility of RRM was 0.88; RRSO was 0.90; both surgeries was 0.79 [24].</li> </ul>                                                                                                           | <ul style="list-style-type: none"> <li>• stage distribution at BC diagnosis, for women under MRI and mammography surveillance versus mammography alone.</li> </ul>                                                                                                                                                                                                          | <ul style="list-style-type: none"> <li>• Reconstruction after RRM was not considered.</li> <li>• Compliance with HRT was not considered.</li> <li>• Impact of premenopausal RRSO on heart disease was not modelled.</li> <li>• BC risk-reduction from RRSO was modelled at 47%.</li> <li>• One way sensitivity analysis was undertaken but PSA not provided.</li> </ul>                                                                                                                                                                                                                                                                                                                                                                                                                                                                                                                                                                                                                                     |
| Kwon, 2013 [5]   | <ul style="list-style-type: none"> <li>• 50% of women diagnosed with BC would choose bilateral mastectomy, and the other half would choose breast-conserving surgery.</li> <li>• All women diagnosed with OC would undergo laparotomy, hysterectomy, BSO, and debulking or other staging surgery.</li> <li>• Cancer patients 10 years post-diagnosis would have the same conditional probability of death as the general population.</li> <li>• 30% of <i>BRCA1/2</i> PV-carriers would choose to undergo RRM and following reconstruction, ranging from 21% between the ages of 25 and 60 years to 34% between the ages of 23 and 64 years.</li> <li>• Uptake rate of RRS was 100%, and women did not have HRT after RRSO.</li> <li>• The BC risk-reduction of RRSO was 40% for <i>BRCA1</i> and 70% for <i>BRCA2</i>; there was no BC risk-reduction from salpingectomy. The OC risk-reduction of RRSO was 80%; the OC risk-reduction of salpingectomy was 60%.</li> <li>• Utility of RRM was 0.86; RRSO was 0.82; both surgeries was 0.79 [23]. Utility of salpingectomy was set at 0.99.</li> </ul> | <ul style="list-style-type: none"> <li>• The QALY of RRSO may be underestimated as no HRT was used after RRSO.</li> <li>• There were limited data on proportion of <i>BRCA</i>-associated OC that primarily arise in fallopian tube and benefits/risks of salpingectomy.</li> <li>• There was uncertainty related to the disutility of RRS and healthcare costs.</li> </ul> | <ul style="list-style-type: none"> <li>• Separate analysis for <i>BRCA1/BRCA2</i> was performed.</li> <li>• Disutility of salpingectomy was set at 0.01. This is an assumption as these data are not available.</li> <li>• BC risk-reduction from RRSO was modelled at 40-70% and may be overestimated.</li> <li>• The true effect size and precision of OC risk-reduction from early salpingectomy is unknown and can affect overall results.</li> <li>• Results are highly sensitive to the disutility of RRSO. The disutility of RRSO in the base case appears high at 0.82. A disutility of RRSO of 0.95 [24] has also subsequently been reported in the literature by the same authors reporting 0.82 initially [23].</li> <li>• RRESDO may not be cost-effective when the utility score of RRSO exceeds 0.93.</li> <li>• The base-case assumed no HRT use after RRSO, which can bias results in favour of RRESDO. HRT use ranging from 40-75% has been reported in the literature [26,27].</li> </ul> |
| Muller, 2018 [6] | <ul style="list-style-type: none"> <li>• Women with BC who did not die or develop a recurrent/contralateral/metastatic BC or develop OC moved to a post-BC state with gradually increasing utility; follow-up and treatment costs were calculated up to year 5 post BC diagnosis. From the sixth year onwards, women stayed in the post-BC state unless another cancer event occurred, with no treatment costs.</li> <li>• Women with recurrent BC or local/regional spread returned to the initial BC state with treatment costs assumed to be the same as for their first BC.</li> <li>• A state for recurrent/metastatic OC was not included due to a lack of stage-specific data and the expected high mortality rate of OC.</li> <li>• Cancer-specific death was assumed to occur only in metastatic BC and OC.</li> <li>• The BC risk-reduction of RRM was 92% without RRSO and 95% with RRSO; the BC risk-reduction of RRSO was 47%; the OC risk-reduction of RRSO was 72%.</li> </ul>                                                                                                           | <ul style="list-style-type: none"> <li>• Data accuracy was limited.</li> <li>• Although BC and OC risks differ by <i>BRCA</i> subtype, this model combined <i>BRCA 1/2</i> PV-carriers.</li> <li>• The QALY of RRSO may be underestimated as no HRT was used after RRSO.</li> </ul>                                                                                         | <ul style="list-style-type: none"> <li>• No separate analysis was performed for <i>BRCA1/BRCA2</i>.</li> <li>• Costs may be underestimated due to the assumption that the costs of recurrent/spread BC were the same as the first BC.</li> <li>• Reconstruction after RRM was not considered.</li> <li>• BC risk-reduction from RRSO was modelled at 47%.</li> <li>• OC risk-reduction from RRSO is underestimated.</li> <li>• Utility of RRS may be a bit lower than estimated.</li> <li>• HRT after RRSO was not considered.</li> </ul>                                                                                                                                                                                                                                                                                                                                                                                                                                                                   |

|                    |                                                                                                                                                                                                                                                                                                                                                                                                                                                                                                                                                                                                                                                                                                                                                                                                                                      |                                                                                                                                                                                                                                                                                                                                                                                                             |                                                                                                                                                                                                                                                                                                                                                                                                                                                                                                                                                                                                                                                                   |
|--------------------|--------------------------------------------------------------------------------------------------------------------------------------------------------------------------------------------------------------------------------------------------------------------------------------------------------------------------------------------------------------------------------------------------------------------------------------------------------------------------------------------------------------------------------------------------------------------------------------------------------------------------------------------------------------------------------------------------------------------------------------------------------------------------------------------------------------------------------------|-------------------------------------------------------------------------------------------------------------------------------------------------------------------------------------------------------------------------------------------------------------------------------------------------------------------------------------------------------------------------------------------------------------|-------------------------------------------------------------------------------------------------------------------------------------------------------------------------------------------------------------------------------------------------------------------------------------------------------------------------------------------------------------------------------------------------------------------------------------------------------------------------------------------------------------------------------------------------------------------------------------------------------------------------------------------------------------------|
|                    | <ul style="list-style-type: none"> <li>• Women did not have HRT after RRSO.</li> <li>• Utility declined as a result of BC or OC and then increased linearly for 5 years to reach the age-specific utility of a post-cancer state, while for metastatic BC and end-stage OC, a permanent decrease in utility was assumed.</li> <li>• Utility of RRM was 0.85; RRSO was 0.83; both surgeries was 0.78 [23]. Disutility of RRS was assumed to increase in a linear manner for 5 years to regain the age-specific utility of an otherwise healthy woman with <i>BRCA1/2</i> PV.</li> </ul>                                                                                                                                                                                                                                               |                                                                                                                                                                                                                                                                                                                                                                                                             | <ul style="list-style-type: none"> <li>• Impact of premenopausal RRSO on heart disease was not modelled</li> <li>• Both one-way and PSA was undertaken.</li> </ul>                                                                                                                                                                                                                                                                                                                                                                                                                                                                                                |
| Norum, 2008 [7]    | <ul style="list-style-type: none"> <li>• The prognosis of <i>BRCA1</i>-associated BC in Norway was poor with almost no benefit of early diagnosis or adjuvant chemo/radiotherapy.</li> <li>• The BC risk-reduction of RRM was ~85% (down to baseline-risk); the BC risk-reduction of RRSO was 50%; the OC risk-reduction from RRSO was 90%.</li> <li>• All premenopausal women had HRT after RRSO.</li> <li>• Half of the <i>BRCA1</i> PV-carriers were in their routine workplace for seven more years.</li> <li>• Productivity loss was included in the analysis.</li> </ul>                                                                                                                                                                                                                                                       | <ul style="list-style-type: none"> <li>• Acceptance of RRM was unknown.</li> <li>• Some assumptions may be debatable, including prognosis of <i>BRCA</i>-associated BC.</li> </ul>                                                                                                                                                                                                                          | <ul style="list-style-type: none"> <li>• Only <i>BRCA1</i> analysis was performed, with <i>BRCA2</i> analysis missing.</li> <li>• Disutility was missing from the model. This is a significant omission.</li> <li>• The outcome measure was life-years gained; utility was not included.</li> <li>• Reconstruction after RRM was not considered.</li> <li>• BC risk-reduction from RRSO was modelled at 50% and is likely overestimated.</li> <li>• Compliance with HRT was not considered.</li> <li>• Impact of premenopausal RRSO on heart disease was not modelled.</li> <li>• PSA was not undertaken though one-way sensitivity analysis provided.</li> </ul> |
| Petelin, 2020 [8]  | <ul style="list-style-type: none"> <li>• Cancer recurrence/remission were not modeled.</li> <li>• Cancer-affected women were at risk of cancer-specific death for 10 years from diagnosis.</li> <li>• <i>BRCA</i>-associated BC mortality were the same as the general BC population.</li> <li>• PARP-I was included only for relapsed OC.</li> <li>• Cancer-affected women attend annual specialist follow-up for 10 years from their diagnosis.</li> <li>• Women had reconstruction after RRM.</li> <li>• The BC risk-reduction of RRM was 93%; the BC risk-reduction of RRSO was 0 for <i>BRCA1</i> and 83% for <i>BRCA2</i>; the OC risk-reduction of RRSO was 81%.</li> <li>• RRSO increased risk of mortality due to cardiovascular disease by 3%.</li> <li>• Utility of RRM was 1. Utility for RRSO was 0.95 [24].</li> </ul> | <ul style="list-style-type: none"> <li>• There was uncertainty around cancer treatment costs, utility score, and the unobservable aspects of <i>BRCA</i>-specific natural history for BC and OC.</li> <li>• It was unlikely that women with <i>BRCA</i> PV would not take any action, so the choice of comparator of “no-action” may overestimate the cost-effectiveness of the service program.</li> </ul> | <ul style="list-style-type: none"> <li>• Separate analysis for <i>BRCA1/BRCA2</i> was performed.</li> <li>• Use of HRT after RRSO was not modelled.</li> <li>• Impact of premenopausal RRSO on heart disease was not modelled</li> <li>• RRM was assumed to cause no disutility.</li> <li>• Disutility with RRSO was short-term only.</li> <li>• One way sensitivity analysis and PSA were undertaken.</li> </ul>                                                                                                                                                                                                                                                 |
| Yamauchi, 2018 [9] | <ul style="list-style-type: none"> <li>• Women had reconstruction after RRM.</li> <li>• The BC risk-reduction of RRM was 90%; the OC risk-reduction of RRSO was 96%. RRSO did not reduce BC-risk.</li> <li>• Utility of RRM was 0.88; RRSO was 0.90; both surgeries was 0.79 [24].</li> </ul>                                                                                                                                                                                                                                                                                                                                                                                                                                                                                                                                        | <ul style="list-style-type: none"> <li>• The BC and OC morbidity among <i>BRCA1/2</i> PV-carriers, BC recurrence rates, cancer risk-reduction from RRS, and utility scores were derived from studies conducted outside Japan.</li> </ul>                                                                                                                                                                    | <ul style="list-style-type: none"> <li>• Separate analysis for <i>BRCA1/BRCA2</i> was performed.</li> <li>• Use of HRT after RRSO was not modelled.</li> <li>• Impact of premenopausal RRSO on heart disease was not modelled</li> <li>• PSA was not undertaken but one-way sensitivity analyses provided.</li> </ul>                                                                                                                                                                                                                                                                                                                                             |
| Gamble, 2017 [10]  | <ul style="list-style-type: none"> <li>• Women who remained alive following OC diagnosis remained at risk of developing BC until cancer-related death (OC) or death from other causes.</li> <li>• Women were considered long-term OC survivors if (1) they had no disease recurrence or progression 7 years after OC diagnosis, or (2) they were alive 15 years after OC recurrence. Long-term OC survivors were considered to no longer be at risk of death from OC.</li> </ul>                                                                                                                                                                                                                                                                                                                                                     | <ul style="list-style-type: none"> <li>• Previously published data from different years in different populations was used.</li> <li>• Other preventive strategies including chemoprevention and</li> </ul>                                                                                                                                                                                                  | <ul style="list-style-type: none"> <li>• An important issue of RRM in <i>BRCA</i> women with OC was addressed.</li> <li>• Separate analysis for <i>BRCA1</i> and <i>BRCA2</i> was performed.</li> <li>• The outcome measure was life-years gained; utility was not included.</li> </ul>                                                                                                                                                                                                                                                                                                                                                                           |

|                      |                                                                                                                                                                                                                                                                                                                                                                                                                                                                                                                                                                                                                                                                                                                                                                                                                                                                                                                                                                                   |                                                                                                                                                                                                                                                                     |                                                                                                                                                                                                                                                                                                                                                                                                                                                                                                                                                                                                                                                                                                                                                                                                                                                                                                                                                              |
|----------------------|-----------------------------------------------------------------------------------------------------------------------------------------------------------------------------------------------------------------------------------------------------------------------------------------------------------------------------------------------------------------------------------------------------------------------------------------------------------------------------------------------------------------------------------------------------------------------------------------------------------------------------------------------------------------------------------------------------------------------------------------------------------------------------------------------------------------------------------------------------------------------------------------------------------------------------------------------------------------------------------|---------------------------------------------------------------------------------------------------------------------------------------------------------------------------------------------------------------------------------------------------------------------|--------------------------------------------------------------------------------------------------------------------------------------------------------------------------------------------------------------------------------------------------------------------------------------------------------------------------------------------------------------------------------------------------------------------------------------------------------------------------------------------------------------------------------------------------------------------------------------------------------------------------------------------------------------------------------------------------------------------------------------------------------------------------------------------------------------------------------------------------------------------------------------------------------------------------------------------------------------|
|                      | <ul style="list-style-type: none"> <li>Women were considered long-term BC survivors if they were alive without evidence of recurrence 15 years after BC diagnosis. Long-term BC survivors were considered to no longer be at risk of death from BC.</li> <li>Among <i>BRCA</i> PV-carriers, 80% would be TNBC and 20% would be non-TNBC.</li> <li>The conditional probability of death in <i>BRCA</i>-associated cancer was the same as that in cancer in general population. <ul style="list-style-type: none"> <li>RRM was performed 1-15 years after OC diagnosis, assuming no disease recurrence/progression.</li> </ul> </li> <li>82% of women undergoing RRM would undergo either immediate/delayed reconstruction.</li> <li>The BC mortality was reduced by 71% from RRM.</li> </ul>                                                                                                                                                                                       | disutility of RRM were not included.                                                                                                                                                                                                                                | <ul style="list-style-type: none"> <li>One way sensitivity analysis and PSA were undertaken.</li> </ul>                                                                                                                                                                                                                                                                                                                                                                                                                                                                                                                                                                                                                                                                                                                                                                                                                                                      |
| <b>Women with LS</b> |                                                                                                                                                                                                                                                                                                                                                                                                                                                                                                                                                                                                                                                                                                                                                                                                                                                                                                                                                                                   |                                                                                                                                                                                                                                                                     |                                                                                                                                                                                                                                                                                                                                                                                                                                                                                                                                                                                                                                                                                                                                                                                                                                                                                                                                                              |
| Kwon, 2008 [11]      | <ul style="list-style-type: none"> <li>All women were at risk for both EC and OC, and these risks were “eliminated” (down to baseline risk) after hysterectomy and BSO.</li> <li>If EC or OC was missed during screening or diagnostic testing, then the diagnosis was made within the next year. <ul style="list-style-type: none"> <li>The lifetime risk of CRC was also included.</li> <li>Compliance with interventions was 100%.</li> <li>Utility of BSO was 0.86 [23].</li> </ul> </li> </ul>                                                                                                                                                                                                                                                                                                                                                                                                                                                                               | <ul style="list-style-type: none"> <li>Empiric data on screening and utility scores was lacking.</li> </ul>                                                                                                                                                         | <ul style="list-style-type: none"> <li>Use of HRT after BSO was not modelled.</li> <li>Impact of premenopausal RRSO on heart disease was not modelled</li> <li>The true disutility with preventive hysterectomy is unknown. <ul style="list-style-type: none"> <li>The disutility of 0.86 modelled was only till age 45 years.</li> <li>PSA was not undertaken though one way sensitivity analyses were presented.</li> </ul> </li> </ul>                                                                                                                                                                                                                                                                                                                                                                                                                                                                                                                    |
| Wright, 2021 [12]    | <ul style="list-style-type: none"> <li>EC and OC diagnoses were independent to each other, and when one of the two cancer diagnoses was made, a patient was no longer at risk of developing the other cancer.</li> <li>EC and OC risk was “eliminated” (down to baseline risk) after hysterectomy and BSO. EC risk after hysterectomy and ES at age 40 years was eliminated with no OC-risk reduction, so patients remained at risk for OC until DO was performed at age 50 years. <ul style="list-style-type: none"> <li>Compliance with interventions was 100%.</li> <li>Anyone receiving a false-positive result from OC screening would immediately undergo hysterectomy and BSO.</li> <li>No added risk of all-cause mortality associated with early menopause after RRSO was included.</li> </ul> </li> <li>Disutility of early menopause was 0.1 till age 50 years; disutility of complication was 0.0425 and of convalescence was 0.025 from RRS for one year.</li> </ul> | <ul style="list-style-type: none"> <li>Lack of data on individual or FH of LS-associated cancers, limited the use of microsimulation.</li> <li>Other LS-associated cancers were not included, given primary focus at gynecologic cancer.</li> </ul>                 | <ul style="list-style-type: none"> <li>This is important analysis providing gene specific cost-effectiveness data in women with LS.</li> <li>Possible OC over-diagnosis during screening.</li> <li>Use of HRT after BSO was not modelled.</li> <li>Impact of premenopausal RRSO on heart disease was not modelled.</li> <li>The demonstration of cost-effectiveness of two-stage strategy of ES and DO in LS women, compared with standard hysterectomy and BSO comes at the cost of an increased cancer incidence and mortality for the two-stage approach which varied dependent on the genetic variant. Hence, this is not ideal for maximizing cancer risk-reduction.</li> <li>There remains significant uncertainty on the effect size of cancer risk-reduction with ES and the disutility with surgical risk-reduction, both of which can significantly impact outcomes.</li> <li>Both one way sensitivity analysis and PSA were presented.</li> </ul> |
| Yang, 2011 [13]      | <ul style="list-style-type: none"> <li>A decision on colorectal surveillance and prevention would be separate and independent from the discussion of gynecologic cancer risks. CRC were not modelled.</li> <li>Women with an abnormal endometrial biopsy including hyperplasia or carcinoma would undergo hysterectomy and BSO.</li> <li>Women with either persistently abnormal findings on pelvic ultrasound, or a combination of elevated CA125 and abnormal pelvic ultrasound would undergo further diagnostic tests and ultimately have hysterectomy and BSO, or return to annual surveillance.</li> </ul>                                                                                                                                                                                                                                                                                                                                                                   | <ul style="list-style-type: none"> <li>Models cannot represent every detail of clinical practice.</li> <li>Some data was not based on women with LS due to limited patient numbers.</li> <li>The impact of non-gynecologic LS-associated malignancies on</li> </ul> | <ul style="list-style-type: none"> <li>Disutility for hysterectomy and BSO was not incorporated.</li> <li>Use of HRT after BSO was not modelled.</li> <li>Impact of premenopausal RRSO on heart disease was not modelled.</li> <li>PSA was not undertaken.</li> </ul>                                                                                                                                                                                                                                                                                                                                                                                                                                                                                                                                                                                                                                                                                        |

|                                             |                                                                                                                                                                                                                                                                                                                                                                                                                                                                                                                                                                                                                                                                                                                                                                                                                                                                                                       |                                                                                                                                                                                                                                                                                                                                                                                                                                                                                                                                                                                                                                                                                                                                                                                                                                                                                                                                       |
|---------------------------------------------|-------------------------------------------------------------------------------------------------------------------------------------------------------------------------------------------------------------------------------------------------------------------------------------------------------------------------------------------------------------------------------------------------------------------------------------------------------------------------------------------------------------------------------------------------------------------------------------------------------------------------------------------------------------------------------------------------------------------------------------------------------------------------------------------------------------------------------------------------------------------------------------------------------|---------------------------------------------------------------------------------------------------------------------------------------------------------------------------------------------------------------------------------------------------------------------------------------------------------------------------------------------------------------------------------------------------------------------------------------------------------------------------------------------------------------------------------------------------------------------------------------------------------------------------------------------------------------------------------------------------------------------------------------------------------------------------------------------------------------------------------------------------------------------------------------------------------------------------------------|
| mortality was not included.                 |                                                                                                                                                                                                                                                                                                                                                                                                                                                                                                                                                                                                                                                                                                                                                                                                                                                                                                       |                                                                                                                                                                                                                                                                                                                                                                                                                                                                                                                                                                                                                                                                                                                                                                                                                                                                                                                                       |
| <b>Women at low/intermediate OC-risk</b>    |                                                                                                                                                                                                                                                                                                                                                                                                                                                                                                                                                                                                                                                                                                                                                                                                                                                                                                       |                                                                                                                                                                                                                                                                                                                                                                                                                                                                                                                                                                                                                                                                                                                                                                                                                                                                                                                                       |
| Manchanda, 2016 [14]                        | <ul style="list-style-type: none"> <li>Compliance with HRT was 80%, and short-term HRT did not affect BC-risk.</li> <li>The chance of both BC and OC occurring at the same time was rare and assumed to be close to zero.</li> <li>Cancer patients 10 years post diagnosis had the same conditional probability of death as the general population.</li> <li>Costs for identifying/calculating OC-risk were not included.</li> <li>The BC risk-reduction of RRSO was 38%; the OC risk-reduction of RRSO was 94%.               <ul style="list-style-type: none"> <li>Excess risk of deaths from CHD was 3.03%.</li> </ul> </li> <li>Disutility of RRSO was 0.95 [24] .</li> </ul>                                                                                                                                                                                                                    | <ul style="list-style-type: none"> <li>The true HRT compliance in a larger broad-based population was not established.</li> <li>The range of utility score for RRSO was large.</li> <li>Complications from RRSO were not included.</li> <li>Extensive sensitivity analyses were undertaken</li> <li>The results were highly sensitive to the disutility of RRSO and HRT compliance.</li> <li>The impact of CHD is incorporated in the model.</li> </ul>                                                                                                                                                                                                                                                                                                                                                                                                                                                                               |
| Manchanda, 2015 [15]                        | <ul style="list-style-type: none"> <li>The chance of both BC and OC occurring at the same time was rare and assumed to be close to zero.</li> <li>70% of women presenting with OC would be at advanced stage.</li> <li>Cancer patients 10 years post diagnosis had the same conditional probability of death as the general population.</li> <li>Costs for identifying/calculating OC-risk were not included.</li> <li>The OC risk-reduction of RRSO was 94%.</li> <li>Excess risk of deaths from CHD was 3.03%.</li> <li>Disutility of RRSO was 0.95 [24] .</li> </ul>                                                                                                                                                                                                                                                                                                                               | <ul style="list-style-type: none"> <li>Costs of genetic testing were not included.</li> <li>The range of utility score for RRSO was large.</li> <li>Complications from RRSO were not included.</li> <li>Extensive sensitivity analyses were undertaken.</li> <li>The results were sensitive to the disutility of RRSO.</li> </ul>                                                                                                                                                                                                                                                                                                                                                                                                                                                                                                                                                                                                     |
| <b>Women at baseline population OC-risk</b> |                                                                                                                                                                                                                                                                                                                                                                                                                                                                                                                                                                                                                                                                                                                                                                                                                                                                                                       |                                                                                                                                                                                                                                                                                                                                                                                                                                                                                                                                                                                                                                                                                                                                                                                                                                                                                                                                       |
| Cadish, 2017 [16]                           | <ul style="list-style-type: none"> <li>The completion rate of OBS at the time of vaginal hysterectomy was 88%.</li> <li>12% of those whose tubes remained in situ required subsequent benign adnexal surgery compared to 4% requiring adnexal surgery after hysterectomy with OBS.</li> <li>The subsequent benign adnexal surgery performed on a woman who had not previously undergone OBS was either a unilateral or bilateral laparoscopic salpingo-oophorectomy; for those who had previously undergone OBS at the time of hysterectomy, the subsequent surgery was assumed to be either unilateral or bilateral laparoscopic oophorectomy.</li> <li>The OC risk-reduction was 65% from OBS, and was 21% from hysterectomy.</li> <li>No data was available regarding the OC risk-reduction from hysterectomy with OBS; it was assumed to be the same as risk-reduction from OBS alone.</li> </ul> | <ul style="list-style-type: none"> <li>OC risk-reduction from OBS was assumed at 65%. This estimate has a number of limitations and biases. Lower estimates of 28% have recently been reported by the same authors [28].</li> <li>Uncertainty remains over the effect size of OC risk-reduction from OBS.</li> <li>The outcome measure was cancer cases/deaths prevented; disutility was not included in the analysis.               <ul style="list-style-type: none"> <li>Recent data suggest hysterectomy alone may not reduce OC-risk [29].</li> </ul> </li> <li>Results are significantly impacted by uncertainty around effect size of OC risk reduction from OBS.</li> <li>Disutility from risk-reducing surgery was not considered and can influence results.</li> <li>Long-term impact of OBS on ovarian function is unknown.</li> <li>PSA was not undertaken though one-way sensitivity analyses were performed.</li> </ul> |
| Dilley, 2017 [17]                           | <ul style="list-style-type: none"> <li>A probability of prior tubal ligation was assumed for women who underwent hysterectomy without salpingectomy.</li> <li>Complication rates were not different in groups with or without OBS. Complication rates were 15% for hysterectomy and 1.6% for tubal ligation.</li> <li>Patients who developed OC and survived were assumed to incur costs only for the initial year with cancer; those who died from OC were assumed to incur costs of the initial year, three additional years, and the final year of life.</li> </ul>                                                                                                                                                                                                                                                                                                                                | <ul style="list-style-type: none"> <li>OC incidence and natural history was simplified and deaths unrelated to OC were not taken into consideration, hence introducing bias.</li> <li>Potential impact of salpingectomy on ovarian function and the</li> <li>OC risk-reduction from OBS was assumed at 65%. Salpingectomy needed to reduce OC-risk by 31% at hysterectomy or 54% at sterilization to remain cost-effective. Lower estimates of 28% OC-risk reduction have recently been reported by the same authors [28] .</li> </ul>                                                                                                                                                                                                                                                                                                                                                                                                |

|                        |                                                                                                                                                                                                                                                                                                                                                                                                                                                                                                                                                                                                   |                                                                                                                                                                                                                                                                                                                                                                                                                                                                                             |                                                                                                                                                                                                                                                                                                                                                                                                                                                                                                                                                                                                                                                                                                  |
|------------------------|---------------------------------------------------------------------------------------------------------------------------------------------------------------------------------------------------------------------------------------------------------------------------------------------------------------------------------------------------------------------------------------------------------------------------------------------------------------------------------------------------------------------------------------------------------------------------------------------------|---------------------------------------------------------------------------------------------------------------------------------------------------------------------------------------------------------------------------------------------------------------------------------------------------------------------------------------------------------------------------------------------------------------------------------------------------------------------------------------------|--------------------------------------------------------------------------------------------------------------------------------------------------------------------------------------------------------------------------------------------------------------------------------------------------------------------------------------------------------------------------------------------------------------------------------------------------------------------------------------------------------------------------------------------------------------------------------------------------------------------------------------------------------------------------------------------------|
|                        | <ul style="list-style-type: none"> <li>Patients who did not have OC or any other surgical related complications were assumed to be in perfect health with a utility score of 1.</li> <li>Patients with OC who did not die from OC were assumed to have one year of life at a utility of 0.64, whereas women who died from OC were assumed to have four years of life at this utility.</li> <li>The OC risk-reduction was 21% from hysterectomy, 28% from tubal ligation, and 65% from OBS.</li> <li>Disutility from surgical complications was 0.23 for one year.</li> </ul>                      | <p>related morbidity and mortality as well as costs were not included.</p> <ul style="list-style-type: none"> <li>OC risk-reduction estimates were dependent on a retrospective study where the actual number of women undergoing OBS was small and salpingectomies were only performed if clinically indicated and not as opportunistic.</li> <li>The study results were not stratified based on OC histology.</li> </ul>                                                                  | <ul style="list-style-type: none"> <li>OBS was assumed to cause no disutility.</li> <li>Results can be significantly impacted by uncertainty around effect size of OBS and disutility from RRS.</li> <li>Recent data suggest hysterectomy alone may not reduce OC-risk [29].</li> <li>Both one-way sensitivity analysis and PSA were undertaken.</li> </ul>                                                                                                                                                                                                                                                                                                                                      |
| Kwon, 2015 [18]        | <ul style="list-style-type: none"> <li>The majority of OC in the population were high-grade serous carcinomas (70%) and majority of those (70%) arise in the fallopian tube.</li> <li>The OC risk-reduction was 20% from hysterectomy, 30% from tubal ligation, 50% from OBS, and 90% from BSO.</li> <li>Premenopausal women who had BSO with hysterectomy were routinely prescribed HRT, but 20% discontinued this by 5 years. Deaths from CHD due to premature menopause from BSO at hysterectomy was modelled.</li> <li>1% risk of inadvertent oophorectomy during OBS was assumed.</li> </ul> | <ul style="list-style-type: none"> <li>There was uncertainty related to the long-term effect on ovarian function and OC risk-reduction from OBS.</li> <li>Utilities, costs associated with potential morbidity and recurrent OC were not included.</li> <li>After hysterectomy with BSO, subsequent adnexal cysts, increased risk of osteoporosis and other cancers were not accounted for.</li> <li>After tubal ligation, possibility for ectopic pregnancy was not considered.</li> </ul> | <ul style="list-style-type: none"> <li>OC risk-reduction from OBS was assumed at 50%. Lower estimates of 28% OC-risk reduction have recently been reported [28].</li> <li>The outcome measure was life-years gained; utility was not included.</li> <li>Recent data suggest hysterectomy alone may not reduce OC-risk [29].</li> <li>Results can be significantly impacted by uncertainty around effect size of OBS.</li> <li>Disutility from risk-reducing surgery was not considered and can influence results.</li> <li>The long-term impact of salpingectomy on ovarian function is not known.</li> <li>PSA was not undertaken though one way sensitivity analyses were provided.</li> </ul> |
| Naumann, 2021 [19]     | <ul style="list-style-type: none"> <li>The OC risk-reduction was 21% from hysterectomy, 33% from tubal ligation, 65% from OBS.</li> <li>Only the costs of OBS and OC were included.</li> <li>Only the utility of OC was included.</li> <li>No disutility from OBS or surgery was included.</li> </ul>                                                                                                                                                                                                                                                                                             | <ul style="list-style-type: none"> <li>The model did not account for future BSO after hysterectomy.</li> <li>The future costs of surgery for retained tubes and adnexa were not considered.</li> </ul>                                                                                                                                                                                                                                                                                      | <ul style="list-style-type: none"> <li>OC risk-reduction from OBS was assumed at 65%. Uncertainty remains over the level of OC risk-reduction from OBS. Lower levels of risk reduction of up to 28% have been reported [28].</li> <li>The disutility from surgery was not included.</li> <li>Results can be significantly impacted by uncertainty around effect size of OBS.</li> <li>Disutility from risk-reducing surgery was not considered and can influence results.</li> <li>Hysterectomy alone may not reduce OC risk [29].</li> </ul>                                                                                                                                                    |
| Subramaniam, 2019 [20] | <ul style="list-style-type: none"> <li>If unsuccessful with salpingectomy, tubal ligation would be attempted.</li> <li>Genetic testing and BSO were not included as a possible option in the model.</li> <li>There was no possibility of decision-regret; reversal of OBS or tubal ligation were not considered.</li> <li>OBS increased theatre time by 15 mins.</li> <li>The procedure-related complication rate was equal between OBS and tubal ligation.</li> </ul>                                                                                                                            | <ul style="list-style-type: none"> <li>The true OC-risk reduction associated with OBS and tubal ligation at the time of caesarean was unknown.</li> <li>Data regarding the complications related to OBS and tubal ligation were limited.</li> </ul>                                                                                                                                                                                                                                         | <ul style="list-style-type: none"> <li>OC risk-reduction from OBS was assumed at 54%.</li> <li>The disutility from surgery was not included.</li> <li>Results can be significantly impacted by uncertainty around effect size of OBS</li> </ul>                                                                                                                                                                                                                                                                                                                                                                                                                                                  |

|                      |                                                                                                                                                                                                                                                                                                                                                                                                                                                                                                                                                                                                                                                                                                                         |                                                                                                                                                                                                                                                                                                                                                                                                                                                                                   |                                                                                                                                                                                                                                                                               |
|----------------------|-------------------------------------------------------------------------------------------------------------------------------------------------------------------------------------------------------------------------------------------------------------------------------------------------------------------------------------------------------------------------------------------------------------------------------------------------------------------------------------------------------------------------------------------------------------------------------------------------------------------------------------------------------------------------------------------------------------------------|-----------------------------------------------------------------------------------------------------------------------------------------------------------------------------------------------------------------------------------------------------------------------------------------------------------------------------------------------------------------------------------------------------------------------------------------------------------------------------------|-------------------------------------------------------------------------------------------------------------------------------------------------------------------------------------------------------------------------------------------------------------------------------|
|                      | <ul style="list-style-type: none"> <li>• Patients not experiencing unplanned pregnancy or developing OC would have perfect health between the time of cesarean and onset of diagnosis respectively.</li> <li>• The OC risk-reduction was 34% from tubal ligation, and 54% from OBS.</li> </ul>                                                                                                                                                                                                                                                                                                                                                                                                                          | <ul style="list-style-type: none"> <li>• The estimated cost difference between OBS and tubal ligation was not precise.</li> </ul>                                                                                                                                                                                                                                                                                                                                                 | <ul style="list-style-type: none"> <li>• Disutility from risk-reducing surgery was not considered and can influence results.</li> <li>• Higher risk of hemorrhage has been reported with OBS at cesarean section.</li> <li>• Both one way and PSA were undertaken.</li> </ul> |
| Tai, 2018 [21]       | <ul style="list-style-type: none"> <li>• The OC risk-reduction was 50% from OBS.</li> <li>• For women who had an ectopic pregnancy after tubal coagulation/clips, unilateral salpingectomy would be performed as a standard treatment with OC-risk reduction reduced by half.</li> <li>• For health states with durations of &lt;1 year (ectopic, cancer states, and postoperative recovery states), QALYs were adjusted according to the proportion of the year women were in those health states.</li> </ul>                                                                                                                                                                                                          | <ul style="list-style-type: none"> <li>• The OC pathway was simplified.</li> <li>• Supportive care costs for palliative chemotherapy for recurrent disease were not included.</li> </ul>                                                                                                                                                                                                                                                                                          | <ul style="list-style-type: none"> <li>• OC risk-reduction from OBS was assumed at 50%.</li> <li>• Uncertainty remains over the OC risk-reduction from OBS.</li> <li>• Disutility from risk-reducing surgery was not considered and can influence results.</li> </ul>         |
| Venkatesh, 2019 [22] | <ul style="list-style-type: none"> <li>• OBS and tubal ligation could be performed in 100% of caesarean sections, and the success rate for completing both types of sterilization was assumed to be 100%.</li> <li>• The OC risk-reduction was 34% from tubal ligation, and 64% from OBS.</li> <li>• Given the paucity of data on OBS with caesarean delivery, data on the risks/benefits were largely derived from OBS with hysterectomy and permanent sterilization.</li> <li>• The perioperative complication rate (including the background complication rate for cesarean section) was 8.3% for OBS and 7.6% for tubal ligation.</li> <li>• Disutility of surgical complications was 0.23 for one year.</li> </ul> | <ul style="list-style-type: none"> <li>• The impact of peripartum OBS on ovarian function and related morbidity was not included.</li> <li>• The study results were not stratified based on OC histology.</li> <li>• Patient decision-regret following sterilization was not included.</li> <li>• Other non-cancer benefits of OBS compared to tubal ligation (apart from contraception efficacy), including elimination of future tubal pathology, were not included.</li> </ul> | <ul style="list-style-type: none"> <li>• OC risk-reduction from OBS was assumed at 64%.</li> <li>• Uncertainty remains over the OC risk-reduction from OBS.</li> <li>• The disutility from surgery was not included and can impact results.</li> </ul>                        |

BC, breast cancer; BSO, bilateral salpingo-oophorectomy; CHD; coronary heart disease; CRC, colorectal cancer; DO, delayed oophorectomy; EC, endometrial cancer; ES, early salpingectomy; FH, family history; HER2, human epidermal growth factor receptor 2; HR, hormone receptor; HRT, hormone replacement treatment; LS, Lynch syndrome; MRI, magnetic resonance imaging; OBS, opportunistic bilateral salpingectomy; OC, ovarian cancer; PARP-i, poly ADP ribose polymerase inhibitor; PSA, probabilistic sensitivity analysis; PV, pathogenic variant; QALY, quality-adjusted life-years; RRES, risk-reducing early salpingectomy; RRESDO, risk-reducing early salpingectomy with delayed oophorectomy; RRM, risk-reducing mastectomy; RRS, risk-reducing surgery; RRSO, risk-reducing salpingo-oophorectomy; TNBC, triple-negative breast cancer; USS, ultrasound scan.

\*refers to limitations reported by each study. #refers to appraisal by authors of this review.

#### Reference

1. Anderson, K.; Jacobson, J.S.; Heitjan, D.F.; Zivin, J.G.; Hershman, D.; Neugut, A.I.; Grann, V.R. Cost-effectiveness of preventive strategies for women with a BRCA1 or a BRCA2 mutation. *Annals of Internal Medicine* **2006**, *144*, 397-406.
2. Bommer, C.; Lupatsch, J.; Bürki, N.; Schwenkglenks, M. Cost-utility analysis of risk-reducing strategies to prevent breast and ovarian cancer in BRCA-mutation carriers in Switzerland. *Eur J Health Econ* **2022**, *23*, 807-821, doi:10.1007/s10198-021-01396-9.
3. Grann, V.R.; Panageas, K.S.; Whang, W.; Antman, K.H.; Neugut, A.I. Decision analysis of prophylactic mastectomy and oophorectomy in BRCA1-positive or BRCA2-positive patients. *Journal of Clinical Oncology* **1998**, *16*, 979-985.
4. Grann, V.R.; Patel, P.R.; Jacobson, J.S.; Warner, E.; Heitjan, D.F.; Ashby-Thompson, M.; Hershman, D.L.; Neugut, A.I. Comparative effectiveness of screening and prevention strategies among BRCA1/2-affected mutation carriers. *Breast Cancer Research & Treatment* **2011**, *125*, 837-847.

5. Kwon, J.S.; Tinker, A.; Pansegrau, G.; McAlpine, J.; Housty, M.; McCullum, M.; Gilks, C.B. Prophylactic salpingectomy and delayed oophorectomy as an alternative for BRCA mutation carriers. *Obstet Gynecol* **2013**, *121*, 14-24, doi:<http://10.1097/AOG.0b013e3182783c2f>  
10.1097/aog.0b013e3182783c2f.
6. Muller, D.; Danner, M.; Rhiem, K.; Stollenwerk, B.; Engel, C.; Rasche, L.; Borsi, L.; Schmutzler, R.; Stock, S. Cost-effectiveness of different strategies to prevent breast and ovarian cancer in German women with a BRCA 1 or 2 mutation. *European Journal of Health Economics* **2018**, *19*, 341-353.
7. Norum, J.; Hagen, A.I.; Maehle, L.; Apold, J.; Burn, J.; Møller, P. Prophylactic bilateral salpingo-oophorectomy (PBSO) with or without prophylactic bilateral mastectomy (PBM) or no intervention in BRCA1 mutation carriers: a cost-effectiveness analysis. *Eur J Cancer* **2008**, *44*, 963-971, doi:10.1016/j.ejca.2008.02.025.
8. Petelin, L.; Hossack, L.; Shanahan, M.; Mitchell, G.; Liew, D.; James, P.A.; Trainer, A.H. Cost-effectiveness of long-term clinical management of BRCA pathogenic variant carriers. *Genetics in Medicine* **2020**, *22*, 831-839.
9. Yamauchi, H.; Nakagawa, C.; Kobayashi, M.; Kobayashi, Y.; Mano, T.; Nakamura, S.; Arai, M. Cost-effectiveness of surveillance and prevention strategies in BRCA1/2 mutation carriers. *Breast Cancer* **2018**, *25*, 141-150.
10. Gamble, C.; Havrilesky, L.J.; Myers, E.R.; Chino, J.P.; Hollenbeck, S.; Plichta, J.K.; Kelly Marcom, P.; Shelley Hwang, E.; Kauff, N.D.; Greenup, R.A. Cost Effectiveness of Risk-Reducing Mastectomy versus Surveillance in BRCA Mutation Carriers with a History of Ovarian Cancer. *Annals of Surgical Oncology* **2017**, *24*, 3116-3123.
11. Kwon, J.S.; Sun, C.C.; Peterson, S.K.; White, K.G.; Daniels, M.S.; Boyd-Rogers, S.G.; Lu, K.H. Cost-effectiveness analysis of prevention strategies for gynecologic cancers in Lynch syndrome. *Cancer* **2008**, *113*, 326-335.
12. Wright, J.D.; Silver, E.R.; Tan, S.X.; Hur, C.; Kastrinos, F. Cost-effectiveness Analysis of Genotype-Specific Surveillance and Preventive Strategies for Gynecologic Cancers Among Women With Lynch Syndrome. *JAMA Netw Open* **2021**, *4*, e2123616, doi:10.1001/jamanetworkopen.2021.23616.
13. Yang, K.Y.; Caughey, A.B.; Little, S.E.; Cheung, M.K.; Chen, L.M. A cost-effectiveness analysis of prophylactic surgery versus gynecologic surveillance for women from hereditary non-polyposis colorectal cancer (HNPCC) Families. *Familial cancer* **2011**, *10*, 535-543.
14. Manchanda, R.; Legood, R.; Antoniou, A.C.; Gordeev, V.S.; Menon, U. Specifying the ovarian cancer risk threshold of 'premenopausal risk-reducing salpingo-oophorectomy' for ovarian cancer prevention: a cost-effectiveness analysis. *J Med Genet* **2016**, *53*, 591-599, doi:10.1136/jmedgenet-2016-103800.
15. Manchanda, R.; Legood, R.; Pearce, L.; Menon, U. Defining the risk threshold for risk reducing salpingo-oophorectomy for ovarian cancer prevention in low risk postmenopausal women. *Gynecol Oncol* **2015**, *139*, 487-494, doi:10.1016/j.ygyno.2015.10.001.
16. Cadish, L.A.; Shepherd, J.P.; Barber, E.L.; Ridgeway, B. Risks and benefits of opportunistic salpingectomy during vaginal hysterectomy: a decision analysis. *Am J Obstet Gynecol* **2017**, *217*, 603.e601-603.e606, doi:10.1016/j.ajog.2017.06.007.
17. Dilley, S.E.; Havrilesky, L.J.; Bakkum-Gamez, J.; Cohn, D.E.; Michael Straughn, J., Jr.; Caughey, A.B.; Rodriguez, M.I. Cost-effectiveness of opportunistic salpingectomy for ovarian cancer prevention. *Gynecologic Oncology* **2017**, *146*, 373-379.
18. Kwon, J.S.; McAlpine, J.N.; Hanley, G.E.; Finlayson, S.J.; Cohen, T.; Miller, D.M.; Gilks, C.B.; Huntsman, D.G. Costs and benefits of opportunistic salpingectomy as an ovarian cancer prevention strategy. *Obstetrics & Gynecology* **2015**, *125*, 338-345.
19. Naumann, R.W.; Hughes, B.N.; Brown, J.; Drury, L.K.; Herzog, T.J. The impact of opportunistic salpingectomy on ovarian cancer mortality and healthcare costs: a call for universal insurance coverage. *Am J Obstet Gynecol* **2021**, *225*, 397.e391-397.e396, doi:10.1016/j.ajog.2021.03.032.
20. Subramaniam, A.; Einerson, B.D.; Blanchard, C.T.; Erickson, B.K.; Szychowski, J.; Leath, C.A., 3rd; Biggio, J.R.; Huh, W.K. The cost-effectiveness of opportunistic salpingectomy versus standard tubal ligation at the time of cesarean delivery for ovarian cancer risk reduction. *Gynecol Oncol* **2019**, *152*, 127-132, doi:10.1016/j.ygyno.2018.11.009.
21. Tai, R.W.M.; Choi, S.K.Y.; Coyte, P.C. The Cost-Effectiveness of Salpingectomies for Family Planning in the Prevention of Ovarian Cancer. *J Obstet Gynaecol Can* **2018**, *40*, 317-327, doi:10.1016/j.jogc.2017.06.038.
22. Venkatesh, K.K.; Clark, L.H.; Stamilio, D.M. Cost-effectiveness of opportunistic salpingectomy vs tubal ligation at the time of cesarean delivery. *Am J Obstet Gynecol* **2019**, *220*, 106.e101-106.e110, doi:10.1016/j.ajog.2018.08.032.

23. Grann, V.R.; Jacobson, J.S.; Sundararajan, V.; Albert, S.M.; Troxel, A.B.; Neugut, A.I. The quality of life associated with prophylactic treatments for women with BRCA1/2 mutations. *Cancer J Sci Am* **1999**, *5*, 283-292.
24. Grann, V.R.; Patel, P.; Bharthuar, A.; Jacobson, J.S.; Warner, E.; Anderson, K.; Warner, E.; Tsai, W.Y.; Hill, K.A.; Neugut, A.I.; et al. Breast cancer-related preferences among women with and without BRCA mutations. *Breast Cancer Res Treat* **2010**, *119*, 177-184, doi:10.1007/s10549-009-0373-6.
25. Menon, U.; Gentry-Maharaj, A.; Burnell, M.; Singh, N.; Ryan, A.; Karpinskyj, C.; Carlino, G.; Taylor, J.; Massingham, S.K.; Raikou, M.; et al. Ovarian cancer population screening and mortality after long-term follow-up in the UK Collaborative Trial of Ovarian Cancer Screening (UKCTOCS): a randomised controlled trial. *Lancet* **2021**, *397*, 2182-2193, doi:10.1016/S0140-6736(21)00731-5.
26. Gaba, F.; Blyuss, O.; Chandrasekaran, D.; Osman, M.; Goyal, S.; Gan, C.; Izatt, L.; Tripathi, V.; Esteban, I.; McNicol, L.; et al. Attitudes towards risk-reducing early salpingectomy with delayed oophorectomy for ovarian cancer prevention: a cohort study. *BJOG* **2021**, *128*, 714-726, doi:10.1111/1471-0528.16424.
27. Gaba, F.; Manchanda, R. Systematic review of acceptability, cardiovascular, neurological, bone health and HRT outcomes following risk reducing surgery in BRCA carriers. *Best Pract Res Clin Obstet Gynaecol* **2020**, *65*, 46-65, doi:10.1016/j.bpobgyn.2020.01.006.
28. Falconer, H.; Yin, L.; Salehi, S.; Altman, D. Association between pelvic inflammatory disease and subsequent salpingectomy on the risk for ovarian cancer. *Eur J Cancer* **2021**, *145*, 38-43, doi:10.1016/j.ejca.2020.11.046.
29. Taylor, J.A.; Burnell, M.; Ryan, A.; Karpinskyj, C.; Kalsi, J.K.; Taylor, H.; Apostolidou, S.; Sharma, A.; Manchanda, R.; Woolas, R.; et al. Association of hysterectomy and invasive epithelial ovarian and tubal cancer: a cohort study within UKCTOCS. *BJog* **2022**, *129*, 110-118, doi:10.1111/1471-0528.16943.
